# Supplementary material for: Deciphering lignin heterogeneity in ball milled softwood: unravelling the synergy between the supramolecular cell wall structure and molecular events
Source: Royal Society of Chemistry journal article supplement (doi:10.1039/d0gc04319b), 2021-01-01
Supplement: d0gc04319b1.pdf [file d0gc04319b1.pdf]

## Supporting Information

### **Deciphering lignin heterogeneity in ball milled softwood; Unravelling the synergy between supramolecular cell wall structure and molecular events**

Ioanna Sapouna,<sup>a</sup> and Martin Lawoko\*<sup>a,b</sup>

<sup>a</sup>Wallenberg Wood Science Center, Department of Fiber and Polymer Technology, School of Chemistry, Royal Institute of Technology, KTH Teknikringen 56–58, 100 44 Stockholm (Sweden)

<sup>b</sup>Division of Wood Chemistry and Pulp Technology, Department of Fiber and Polymer Technology, School of Chemistry, Royal Institute of Technology, KTH Teknikringen 56–58, 100 44 Stockholm (Sweden)

e-mail: [lawoko@kth.se](mailto:lawoko@kth.se)

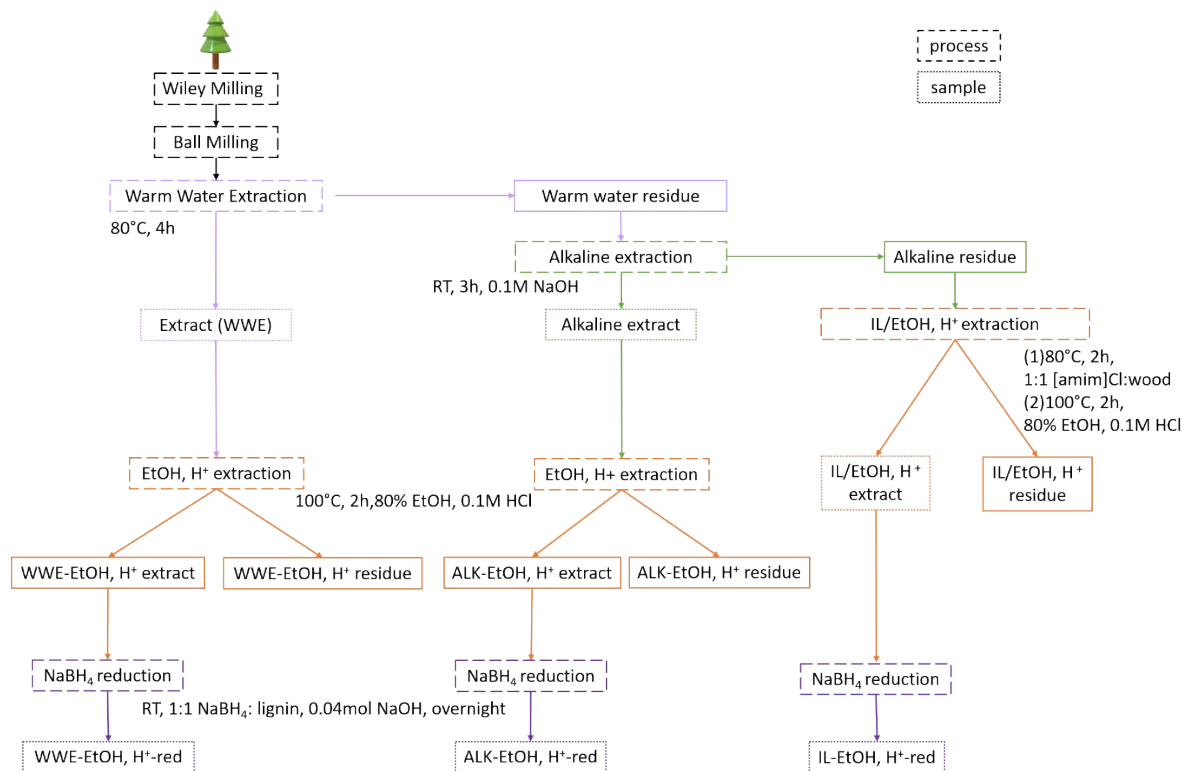

Figure S1: The extraction protocol.

For the relative determination of lignin and hemicelluloses in the extracted fractions, the following equations (S1&S2) were used. In the first one, for the determination of the hemicelluloses extracted in the fraction, the C2-Ar signal of the phenyl propane unit is integrated and set to 100 ( $y$ ) and the region where the signals for the anomeric C1 appear is also integrated ( $x$ ). The ratio of the hemicelluloses to the total hemicelluloses and lignin ( $x + y$ ) is multiplied with the molecular weight ratio of the phenyl propane unit ( $183 \text{ g} \times \text{mol}^{-1}$ ) to the anhydro sugar ( $162 \text{ g} \times \text{mol}^{-1}$ ). Afterwards, the value is multiplied with the percentage of wood extracted in this fraction. The result is divided by the theoretical amount of hemicelluloses in softwoods (0.3) to yield the %hemicelluloses on wood basis. For the second equation, the region where the anomeric carbon C1 of the hemicelluloses resonate is integrated first and set to 100 ( $x$ ) followed by the C2-Ar signal of the phenyl propane unit ( $y$ ). The ratio of the later ( $y$ ) to the total amount of lignin and hemicelluloses ( $y + x$ ) is then multiplied with the ratio of the molecular weights of anhydro sugar to phenyl propane and the % of wood extracted. The result is divided by the theoretical amount of lignin in softwoods expressed as 0.27 to yield the percentage of lignin on wood basis.

$$\frac{\frac{x}{x+y} \times \frac{183}{162} \times \% \text{ of wood extracted}}{0.3} = \% \text{hemicelluloses on wood basis}$$

$$\frac{\frac{y}{y+x} \times \frac{162}{183} \times \% \text{ of wood extracted}}{0.27} = \% \text{lignin on wood basis}$$

Equations S1&S2: Determination of relative %hemicelluloses and %lignin on wood basis for the extracted fractions.

In Tables S1a-c, the reported amounts of lignin and hemicelluloses were calculated using the results from the HSQC NMR experiments and Equations S1&S2. Klason lignin, acid soluble lignin and carbohydrate analysis using the classical, acid hydrolysis protocol was performed for a few representative samples, in order to confirm the composition of the fractions. The process as well as the results are presented in Table S2c.

Table S1a: Mass balance of extracted material from warm water extraction as a function of milling time and atmosphere.

|            | <i>Warm water extraction</i> | Average mass extracted (mg) | % wood extracted | Wood basis |                  | Fraction |                  |
|------------|------------------------------|-----------------------------|------------------|------------|------------------|----------|------------------|
|            |                              |                             |                  | % lignin   | % hemicelluloses | % lignin | % hemicelluloses |
| Air milled | <i>1h ball milled</i>        | 18.7 ± 2.4                  | 1.8              | 1.75       | 4.7              | 29.7     | 70.3             |
|            | <i>2h ball milled</i>        | 23.5 ± 3.3                  | 2.3              | 1.15       | 7.3              | 15.3     | 84.7             |
|            | <i>4h ball milled</i>        | 39.0 ± 1.6                  | 3.9              | 1.4        | 13.1             | 10.6     | 89.4             |
|            | <i>8h ball milled</i>        | 100.6 ± 9.8                 | 10.0             | 3.5        | 33.7             | 10.6     | 89.4             |
|            | <i>12h ball milled</i>       | 121.0 ± 3.8                 | 12.1             | 3.7        | 41.3             | 9.0      | 91.0             |
|            | <i>18h ball milled</i>       | 148.8 ± 9.5                 | 14.9             | 5.3        | 50.0             | 10.8     | 89.2             |
|            | <i>24h ball milled</i>       | 145.3 ± 11.9                | 14.5             | 5.5        | 48.2             | 11.7     | 88.3             |
|            |                              |                             |                  |            |                  |          |                  |
| N2 milled  | <i>1h ball milled</i>        | 26.0 ± 1.8                  | 2.6              | 1.4        | 8.1              | 16.8     | 83.2             |
|            | <i>2h ball milled</i>        | 47.9 ± 6.5                  | 4.8              | 2.2        | 15.5             | 14.4     | 85.6             |
|            | <i>4h ball milled</i>        | 82.1 ± 0.7                  | 8.2              | 3.9        | 26.4             | 14.4     | 85.6             |
|            | <i>8h ball milled</i>        | 120.1 ± 3.3                 | 12.0             | 4.4        | 40.1             | 11.2     | 88.8             |
|            | <i>12h ball milled</i>       | 146.7 ± 14.0                | 14.7             | 5.6        | 48.9             | 11.7     | 88.3             |
|            | <i>18h ball milled</i>       | 164.8 ± 11.2                | 16.5             | 5.9        | 55.4             | 10.9     | 89.1             |
|            | <i>24h ball milled</i>       | 179.5 ± 13.8                | 18.0             | 6.9        | 59.8             | 11.8     | 88.2             |

Table S1b: Mass balance of extracted material from mild alkaline extraction as a function of milling time and atmosphere.

|            | <i>Alkaline extraction</i> | Average mass extracted (mg) | % wood extracted | Wood basis |                  | Fraction |                  |
|------------|----------------------------|-----------------------------|------------------|------------|------------------|----------|------------------|
|            |                            |                             |                  | % lignin   | % hemicelluloses | % lignin | % hemicelluloses |
| Air milled | <i>1h ball milled</i>      | 14.7 ± 1.3                  | 1.5              | 4.2        | 0.8              | 85.1     | 14.9             |
|            | <i>2h ball milled</i>      | 18.4 ± 0.1                  | 1.8              | 5.0        | 1.0              |          |                  |
|            | <i>4h ball milled</i>      | 21.2 ± 0.8                  | 2.1              | 5.9        | 1.2              |          |                  |
|            | <i>8h ball milled</i>      | 30.1 ± 3.8                  | 3.0              | 8.1        | 2.0              | 82.2     | 17.8             |
|            | <i>12h ball milled</i>     | 53.6 ± 8.5                  | 5.4              | 14.6       | 3.6              |          |                  |
|            | <i>18h ball milled</i>     | 70.0 ± 4.9                  | 7.0              | 16.5       | 7.4              | 72.1     | 27.9             |
|            | <i>24h ball milled</i>     | 80.8 ± 15.8                 | 8.1              | 21.3       | 6.0              | 80.3     | 19.7             |
|            |                            |                             |                  |            |                  |          |                  |
| N2 milled  | <i>1h ball milled</i>      | 15.8 ± 0.6                  | 1.5              | 4.4        | 0.6              | 90.0     | 9.8              |
|            | <i>2h ball milled</i>      | 19.0 ± 1.1                  | 1.9              | 5.6        | 0.7              |          |                  |
|            | <i>4h ball milled</i>      | 33.1 ± 2.7                  | 3.3              | 9.75       | 1.2              |          |                  |
|            | <i>8h ball milled</i>      | 52.1 ± 3.0                  | 5.2              | 14.3       | 3.2              | 83.7     | 16.3             |
|            | <i>12h ball milled</i>     | 86.0 ± 9.7                  | 8.6              | 22.5       | 6.6              | 79.8     | 20.2             |
|            | <i>18h ball milled</i>     | 110.7 ± 13.6                | 11.1             | 31.7       | 5.4              | 87.0     | 13.0             |
|            | <i>24h ball milled</i>     | 167.7 ± 1.4                 | 16.8             | 49.4       | 6.6              | 89.6     | 10.4             |

Table S1c: Mass balance of extracted material from IL-EtOH/H<sup>+</sup> extraction as a function of milling time and atmosphere.

|            | <i>IL-EtOH, H<sup>+</sup> extraction</i> | Average mass extracted (mg) | % wood extracted | Wood basis | Fraction  |
|------------|------------------------------------------|-----------------------------|------------------|------------|-----------|
|            |                                          |                             |                  | % lignin   | % lignin* |
| Air milled | 1h ball milled                           | 31.7 ± 4.5                  | 3.2              | 11.8       | 100       |
|            | 2h ball milled                           | 41.0 ± 2.0                  | 4.1              | 15.2       | 100       |
|            | 4h ball milled                           | 87.8 ± 2.3                  | 8.8              | 32.6       | 100       |
|            | 8h ball milled                           | 97.3 ± 1.6                  | 9.7              | 35.9       | 100       |
|            | 12h ball milled                          | 89.9 ± 27.4                 | 9.0              | 33.4       | 100       |
|            | 18h ball milled                          | 76.9 ± 4.0                  | 7.7              | 28.5       | 100       |
|            | 24h ball milled                          | 101.7 ± 8.9                 | 10.2             | 37.8       | 100       |
| N2 milled  | 1h ball milled                           | 53.4 ± 12.9                 | 5.3              | 19.6       | 100       |
|            | 2h ball milled                           | 57.4 ± 21.3                 | 5.7              | 21.1       | 100       |
|            | 4h ball milled                           | 76.2 ± 0.8                  | 7.6              | 28.1       | 100       |
|            | 8h ball milled                           | 59.3 ± 12.7                 | 5.9              | 21.8       | 100       |
|            | 12h ball milled                          | 74.2 ± 6.2                  | 7.4              | 27.4       | 100       |
|            | 18h ball milled                          | 102.1 ± 3.3                 | 10.2             | 37.8       | 100       |
|            | 24h ball milled                          | 75.5 ± 1.6                  | 7.6              | 28.1       | 100       |

\* Carbohydrates below detection limit.

In Tables S2a-b the amount of residual lignin and hemicelluloses is calculated based on the theoretical 27% and 30% in softwoods respectively, by subtracting the amounts extracted in all the extraction steps. After drying the residue of the IL/EtOH, H<sup>+</sup> extraction it was not possible to re-disperse the material due to cellulose hornification, hence Klason lignin and sugar analysis was not possible with that method.

Klason lignin, acid soluble lignin (ASL) and carbohydrate analysis of the starting material, i.e. Wiley milled spruce and a few representative samples, were determined with acid hydrolysis.<sup>1</sup> In short, 100 mg of the lyophilized sample were mixed with 1.5 mL of 72% H<sub>2</sub>SO<sub>4</sub> and placed in a vacuum desiccator for 80min, with occasional stirring. 42 mL of Milli-Q water were added to the mixture and the reaction bottles were sealed and placed in the autoclave at 125°C for 1h. Afterwards, the mixture was filtered through a pre-weighed glass fiber filter, which was then used for the gravimetric determination of Klason lignin. The hydrolysate was further diluted and analysed with High-Performance Anion-Exchange Chromatography equipped with Pulse Amperometric Detector (HPAEC-PAD) ICS 3000 (Dionex, ThermoScientific, USA). Acid soluble lignin was determined by measuring the absorbance of the diluted hydrolysate at 205nm and the Equation S3. The results are presented in Table S2c.

$$ASL\% = 100 \times \frac{A \times V \times f}{a \times b \times M} - 0.2$$

A= absorbance value at 205 nm

V= volume of hydrolysate (L)

f= dilution factor

α= absorptivity (L×g<sup>-1</sup>×cm<sup>-1</sup>). For softwood, α=128 L×g<sup>-1</sup>×cm<sup>-1</sup>

b= path length (cm)

M= dry weight of the sample (g)

0.2 is a correction value used for the absorbance of sugar degradation products at 205 nm

Equation S3: Determination of acid soluble lignin (ASL).

Table S2a: Total mass balance of lignin from all the steps of the extraction protocol on wood basis and residual lignin. Standard deviation for each fraction is reported in Tables S1a-c.

|            | % lignin<br>extracted <sup>1</sup> | Warm<br>water<br>extraction | Alkaline<br>extraction | IL/EtOH, H <sup>+</sup><br>extraction | Total lignin<br>extracted | Residual lignin* |
|------------|------------------------------------|-----------------------------|------------------------|---------------------------------------|---------------------------|------------------|
| Air milled | 1h ball milled                     | 1.8                         | 4.2                    | 11.8                                  | 17.8                      | 82.2             |
|            | 2h ball milled                     | 1.2                         | 5.0                    | 15.2                                  | 21.4                      | 78.6             |
|            | 4h ball milled                     | 1.4                         | 5.9                    | 32.6                                  | 39.9                      | 60.1             |
|            | 8h ball milled                     | 3.5                         | 8.1                    | 35.9                                  | 47.5                      | 52.5             |
|            | 12h ball milled                    | 3.7                         | 14.6                   | 33.4                                  | 51.7                      | 48.3             |
|            | 18h ball milled                    | 5.3                         | 16.5                   | 28.5                                  | 50.3                      | 49.7             |
|            | 24h ball milled                    | 5.5                         | 21.3                   | 37.8                                  | 64.6                      | 35.4             |
| N2 milled  | 1h ball milled                     | 1.4                         | 4.4                    | 19.6                                  | 25.4                      | 74.6             |
|            | 2h ball milled                     | 2.2                         | 5.6                    | 21.1                                  | 28.9                      | 71.1             |
|            | 4h ball milled                     | 3.9                         | 9.8                    | 28.1                                  | 41.8                      | 58.2             |
|            | 8h ball milled                     | 4.4                         | 14.3                   | 21.8                                  | 40.5                      | 59.5             |
|            | 12h ball milled                    | 5.6                         | 22.5                   | 27.4                                  | 55.5                      | 44.5             |
|            | 18h ball milled                    | 5.9                         | 31.7                   | 37.8                                  | 75.4                      | 24.6             |
|            | 24h ball milled                    | 6.9                         | 49.3                   | 28.1                                  | 84.3                      | 15.7             |

<sup>1</sup> The %lignin is calculated on wood basis.

\* Residual lignin was estimated after addition of the extracted lignin amounts and considering a theoretical 27% lignin in softwoods, as earlier discussed.

Table S2b: Total mass balance of extracted hemicelluloses from warm water extraction and mild alkaline extraction. Standard deviation for each fraction is reported in Tables S1a-c.

|            | % Hemicelluloses<br>extracted <sup>1</sup> | Warm water<br>extraction | Alkaline<br>extraction | Total<br>hemicelluloses<br>extracted | Residual<br>Hemicelluloses* |
|------------|--------------------------------------------|--------------------------|------------------------|--------------------------------------|-----------------------------|
| Air milled | 1h ball milled                             | 4.7                      | 0.8                    | 5.5                                  | 94.5                        |
|            | 2h ball milled                             | 7.3                      | 1.0                    | 8.3                                  | 91.7                        |
|            | 4h ball milled                             | 13.1                     | 1.2                    | 14.3                                 | 85.7                        |
|            | 8h ball milled                             | 33.7                     | 2.0                    | 35.7                                 | 64.3                        |
|            | 12h ball milled                            | 41.3                     | 3.6                    | 44.9                                 | 55.1                        |
|            | 18h ball milled                            | 50.0                     | 7.4                    | 57.4                                 | 42.6                        |
|            | 24h ball milled                            | 48.2                     | 6.0                    | 54.2                                 | 45.8                        |
| N2 milled  | 1h ball milled                             | 8.1                      | 0.6                    | 8.7                                  | 91.4                        |
|            | 2h ball milled                             | 15.5                     | 0.7                    | 16.2                                 | 83.8                        |
|            | 4h ball milled                             | 26.4                     | 1.2                    | 27.6                                 | 72.4                        |
|            | 8h ball milled                             | 40.1                     | 3.2                    | 43.3                                 | 56.7                        |
|            | 12h ball milled                            | 48.9                     | 6.6                    | 55.5                                 | 44.6                        |
|            | 18h ball milled                            | 55.4                     | 5.4                    | 60.8                                 | 39.2                        |
|            | 24h ball milled                            | 59.8                     | 6.6                    | 66.4                                 | 33.6                        |

<sup>1</sup> The %hemicellulose is calculated on wood basis.

\* Residual hemicelluloses were calculated by addition of the extracted amounts and considering a theoretical yield of 30% hemicelluloses for softwoods, as discussed above.

Table S2c: Klason lignin and sugar analysis of the starting material, i.e. Wiley milled spruce. The process is described in the Materials and Methods section. Monosugars detected but not quantified because they were below limit of detection are marked with <l.o.d in the corresponding cells in the Table.

|                            | % Ara  | % Rha  | % Gal | % Glc  | % Xyl  | % Man  | %Total carbohydrates | %Klason lignin <sup>1</sup> | %ASL <sup>1</sup> | %Mass balance     |
|----------------------------|--------|--------|-------|--------|--------|--------|----------------------|-----------------------------|-------------------|-------------------|
| <i>Wiley milled spruce</i> | 1.1    | -      | 2.1   | 41     | 5.9    | 10.8   | 60.9                 | 33.0                        | 1.2               | 95.1              |
| <i>WWE 24h air</i>         | 2.9    | <l.o.d | 3.9   | 10.1   | 12.7   | 26.4   | 56.0                 | 6.9                         | 2.5               | 65.4 <sup>2</sup> |
| <i>WWE 24h N2</i>          | 3.0    | <l.o.d | 4.1   | 10.6   | 13.9   | 26.7   | 58.3                 | 7.6                         | 3.0               | 68.9 <sup>2</sup> |
| <i>Alkaline 24h</i>        | 0.6    | -      | 2.0   | 5.8    | 2.1    | 5.9    | 16.4                 | 67.8                        | 1.7               | 85.9              |
| <i>Alkaline 24h N2</i>     | 0.6    | -      | 2.0   | 4.9    | 2.1    | 5.9    | 15.5                 | 69.8                        | 1.5               | 86.8              |
| <i>IL 24h</i>              | <l.o.d | -      | 0.4   | <l.o.d | <l.o.d | <l.o.d | 0.4                  | 74.5                        | 3.0               | 77.9 <sup>3</sup> |
| <i>IL 24h N2</i>           | <l.o.d | -      | 0.4   | <l.o.d | <l.o.d | <l.o.d | 0.4                  | 72.6                        | 3.3               | 76.3 <sup>3</sup> |

<sup>1</sup> Includes extractives.

<sup>2</sup> Lower mass balance for WWE fractions for a number of reasons: acetyl decorations are not included as these are hydrolysed by the acid treatment, oxidized structures in carbohydrates created during ball milling are not analysed, galacturonic acids and glucuronic acids not analysed.

<sup>3</sup> Some residual ionic liquid present in sample and contributes to lower mass balance. This was also verified by NMR analysis.

Table S2d: Comparison between the hemicellulose and lignin amounts present in fractions of the protocol, analysed by acid hydrolysis as described in the text above and NMR.

|                        | %Hemicelluloses           |                  | %Lignin                         |                  |
|------------------------|---------------------------|------------------|---------------------------------|------------------|
|                        | IC/HPAEC-PAD <sup>1</sup> | NMR <sup>2</sup> | Klason lignin +ASL <sup>1</sup> | NMR <sup>2</sup> |
| <i>WWE 24h</i>         | 56.0 <sup>3</sup>         | 88.3             | 9.4                             | 11.7             |
| <i>WWE 24h N2</i>      | 58.3 <sup>3</sup>         | 88.2             | 10.6                            | 11.8             |
| <i>Alkaline 24h</i>    | 16.4                      | 19.7             | 69.5                            | 80.3             |
| <i>Alkaline 24h N2</i> | 15.5                      | 10.4             | 71.3                            | 89.6             |
| <i>IL 24h</i>          | 0.4                       | -                | 77.5                            | 100*             |
| <i>IL 24h N2</i>       | 0.4                       | -                | 75.9                            | 100*             |

<sup>1</sup> This analysis gives the absolute values.

<sup>2</sup> This analysis is semi-quantitative and gives the relative values between lignin and hemicelluloses.

<sup>3</sup> Discrepancies when compared to NMR since some acetyl groups, uronic acids and possible oxidized moieties escaped the analysis but were included in the NMR analysis.

\*Carbohydrates below detection limit.

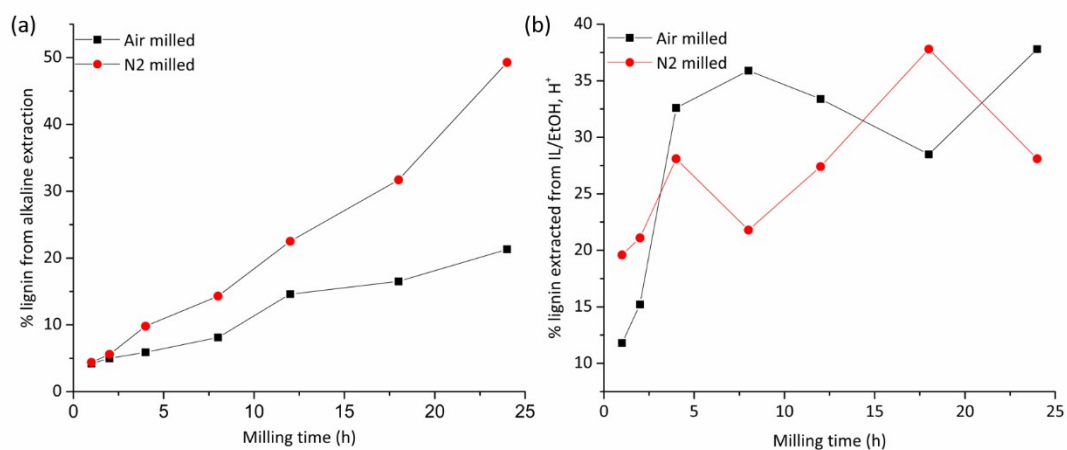

Figure S2: Lignin mass balance from (a) mild alkaline extraction and (b) IL/EtOH, H<sup>+</sup> extraction.

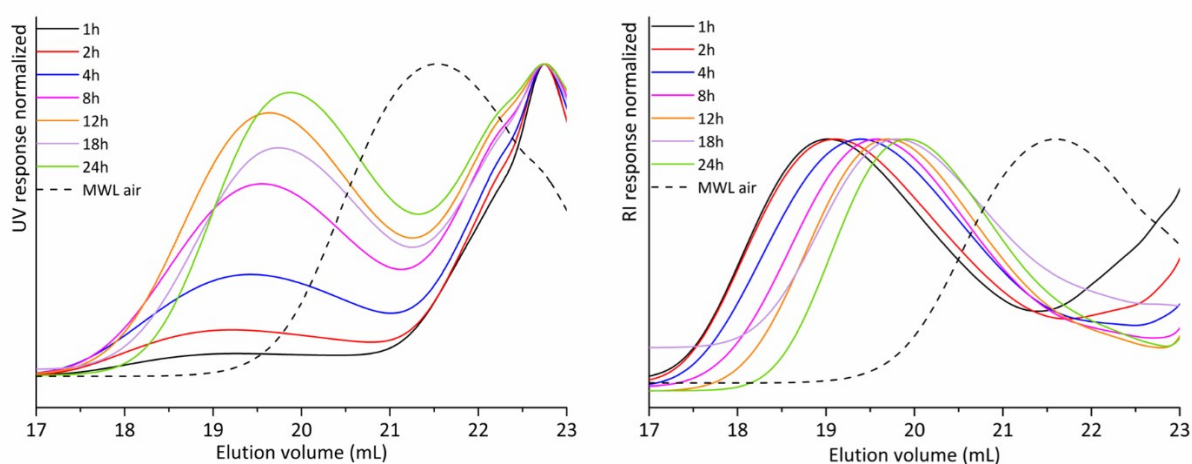

Figure S3a: DMSO SEC overlay of warm water extracts milled in air.

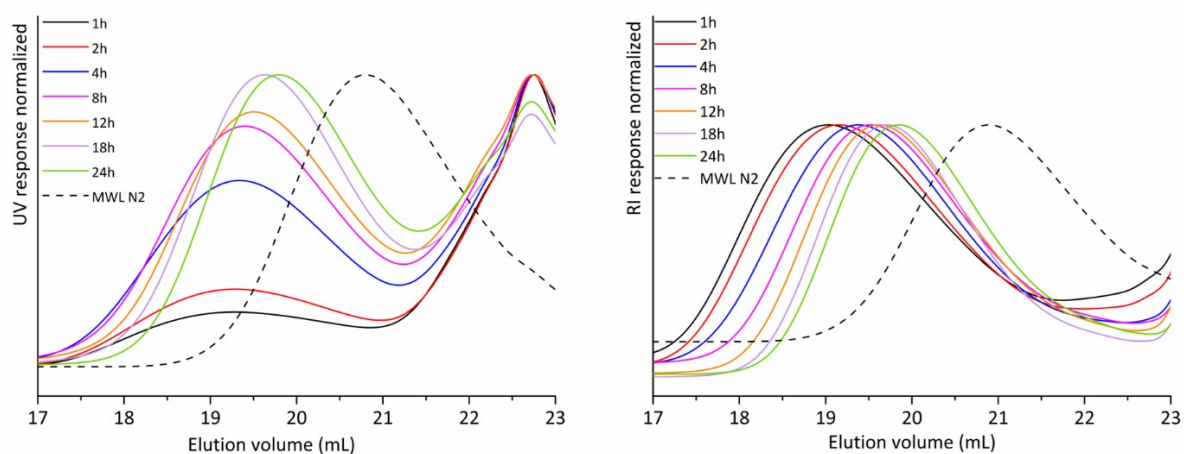

Figure S3b: DMSO-SEC overlay of warm water extracts milled in N<sub>2</sub> atmosphere.

Table S3: Results of DMSO SEC using refractive index detector calibration with pullulan standards. The reported values correspond to the largest area peak.

**Warm water**

|            | extraction      | Mn<br>(g/mol) | Mw<br>(g/mol) | PDI  |
|------------|-----------------|---------------|---------------|------|
| Air milled | 1h ball milled  | 8416          | 19690         | 2.34 |
|            | 2h ball milled  | 7110          | 17771         | 2.50 |
|            | 4h ball milled  | 5449          | 14342         | 2.63 |
|            | 8h ball milled  | 4786          | 11805         | 2.47 |
|            | 12h ball milled | 3078          | 10051         | 2.27 |
|            | 18h ball milled | 2896          | 8524          | 2.94 |
|            | 24h ball milled | 3779          | 7676          | 2.03 |
|            |                 |               |               |      |
| N2 milled  | 1h ball milled  | 7309          | 18344         | 2.51 |
|            | 2h ball milled  | 5707          | 16463         | 2.88 |
|            | 4h ball milled  | 5496          | 14070         | 2.56 |
|            | 8h ball milled  | 4965          | 11727         | 2.36 |
|            | 12h ball milled | 4643          | 10284         | 2.21 |
|            | 18h ball milled | 4576          | 9326          | 2.04 |
|            | 24h ball milled | 4075          | 8117          | 1.99 |
|            |                 |               |               |      |

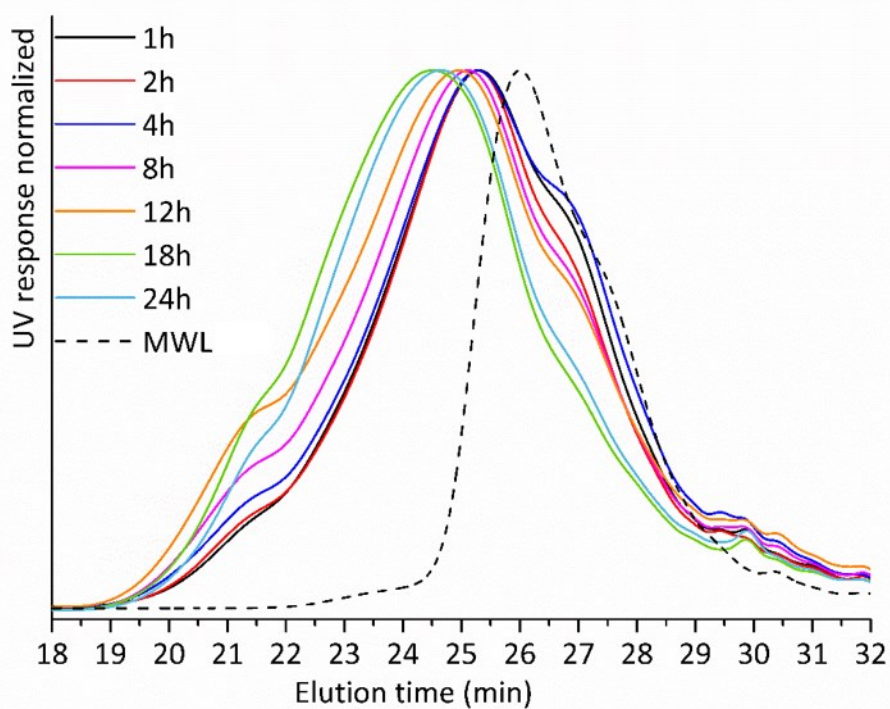

Figure S4a: THF SEC of IL/EtOH, H<sup>+</sup> fractions milled in air.



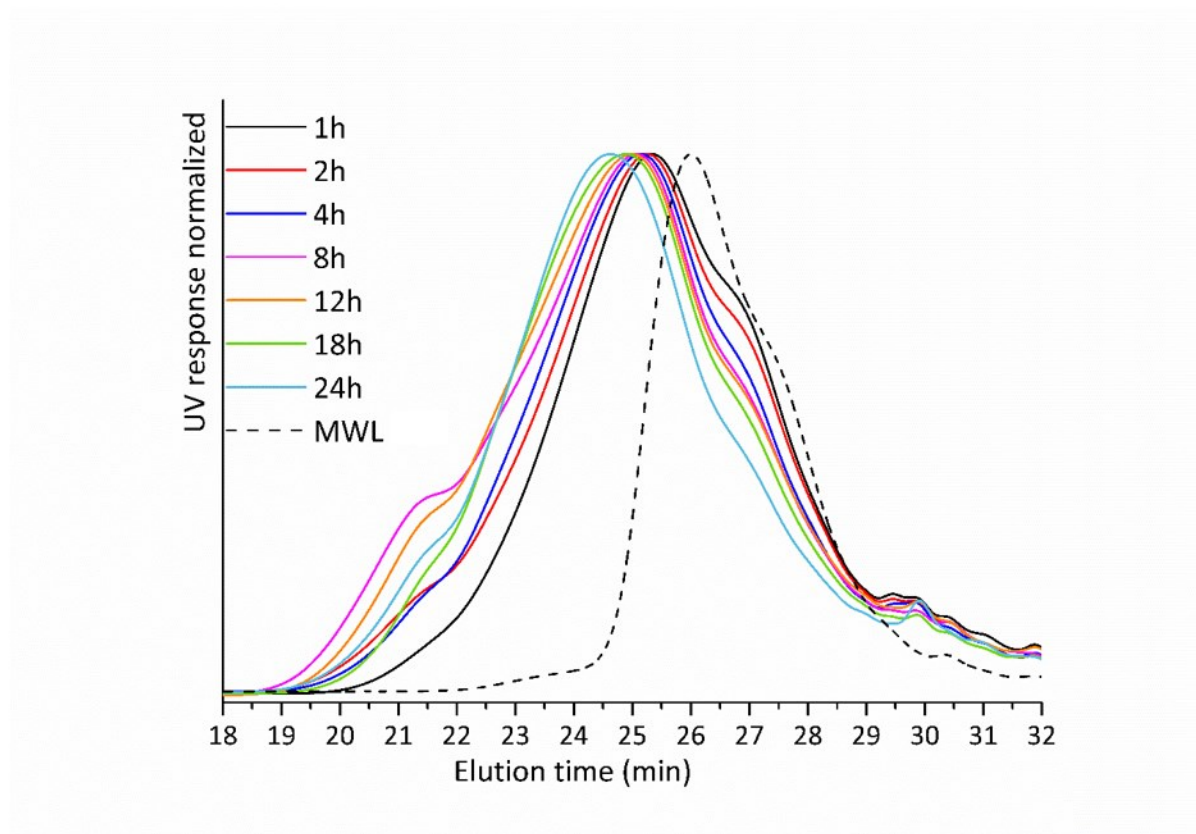

Figure S4b: THF SEC of the IL/EtOH, H<sup>+</sup> fractions milled in nitrogen atmosphere.

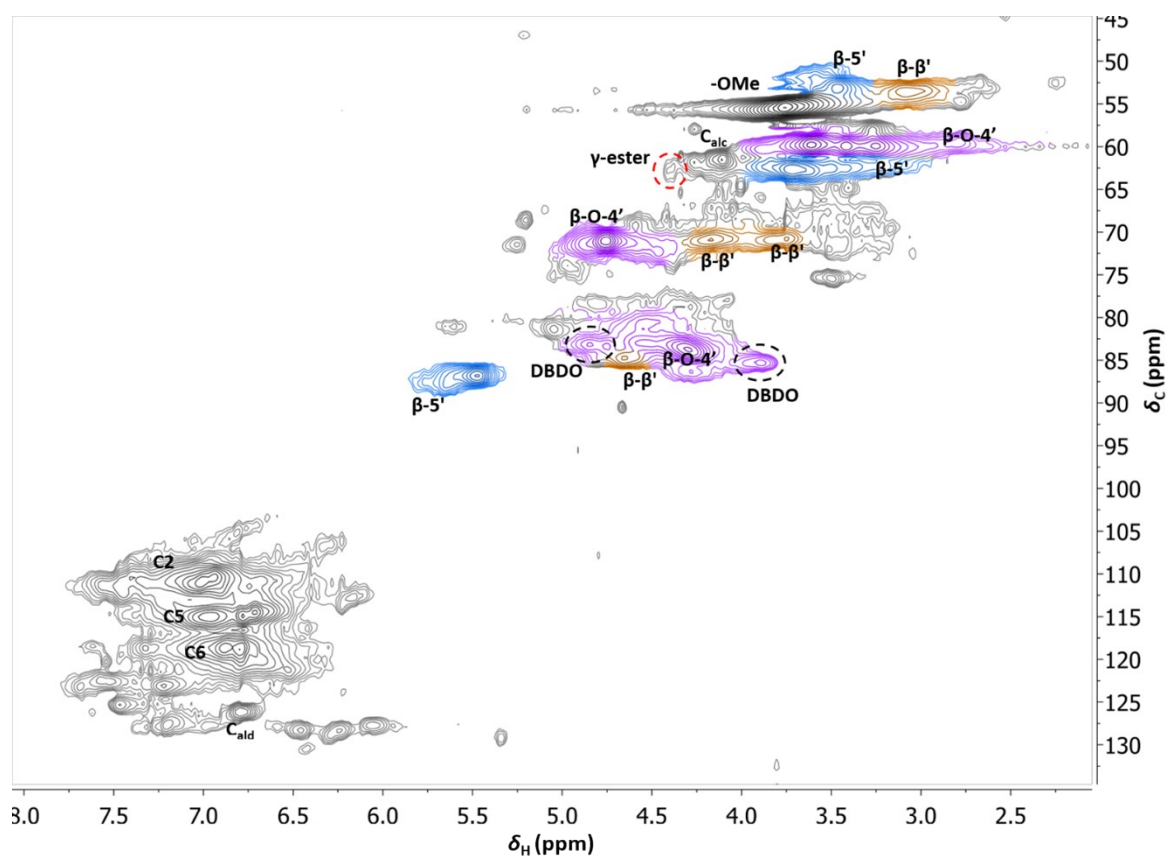

Figure S5: HSQC of MWL after purification for the removal of carbohydrates. The starting material was 18h ball milled wood in air. DMSO-*d*<sub>6</sub> was used for the NMR. Peak assignment can be found in Tables S7, S8.

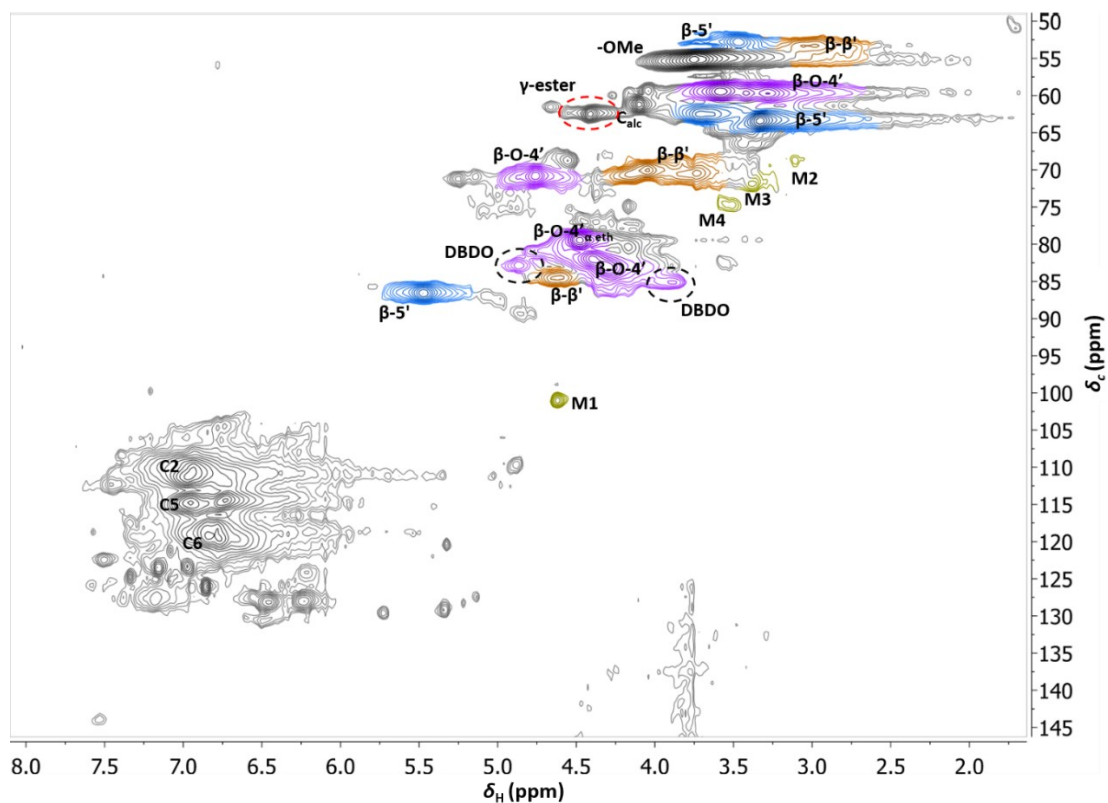

Figure S6a: HSQC of ALK-EtOH, H<sup>+</sup>- red sample. DMSO-*d*<sub>6</sub> was used for the NMR. Peak assignment can be found in Tables S7, S8.

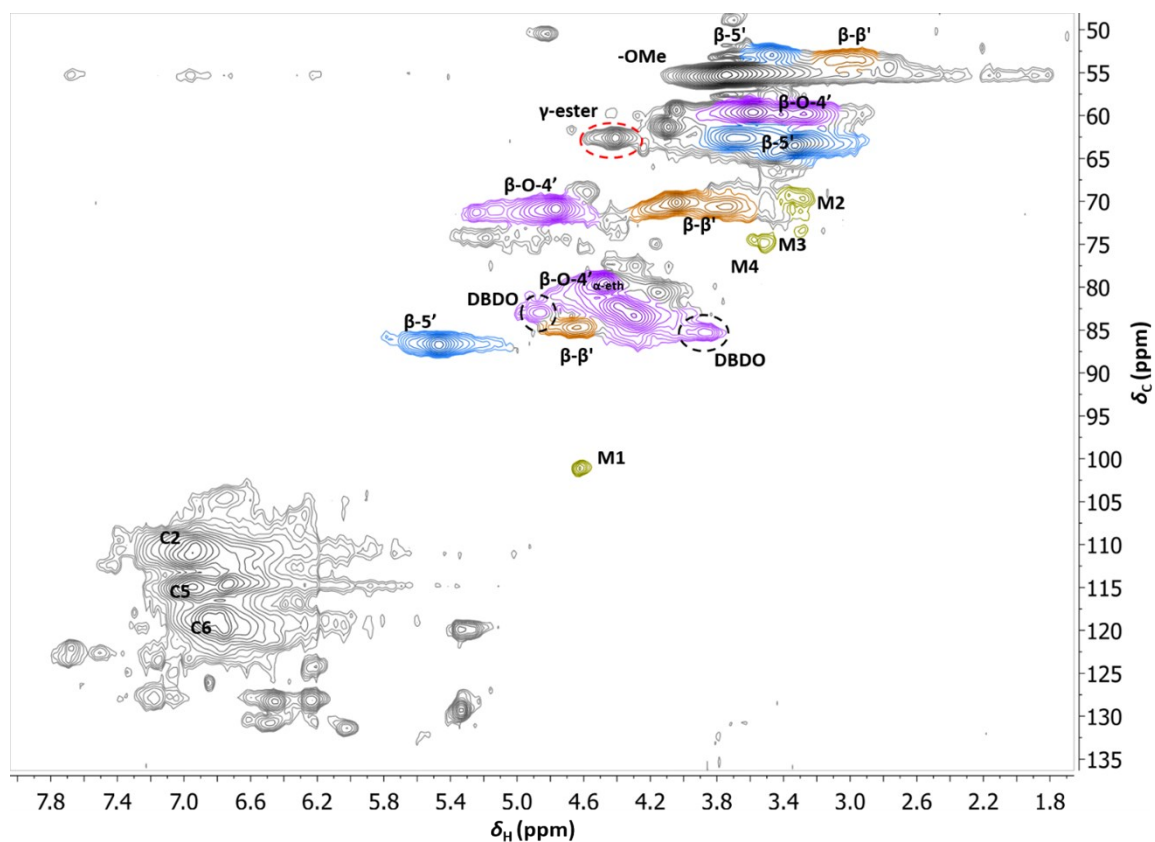

Figure S6b: HSQC of IL/EtOH, H<sup>+</sup>- red sample. DMSO-*d*<sub>6</sub> was used for the NMR. Peak assignment can be found in Tables S7, S8.

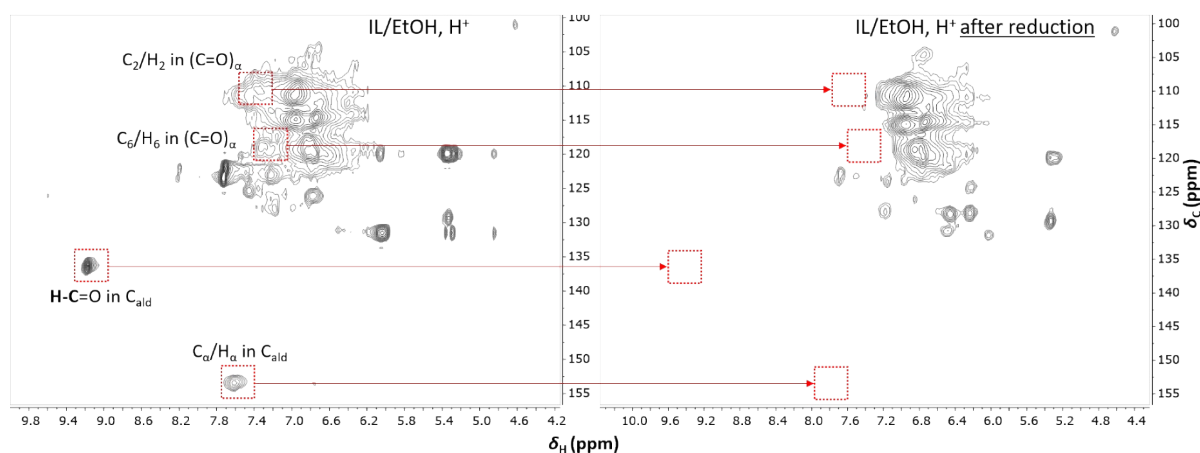

Figure S6c: HSQC of IL/EtOH, H<sup>+</sup> sample before and after reduction. The marked areas highlight the completion of the reduction as the aldehyde signals disappear. DMSO-*d*<sub>6</sub> was used for the NMR. Peak assignment can be found in Tables S7, S8.

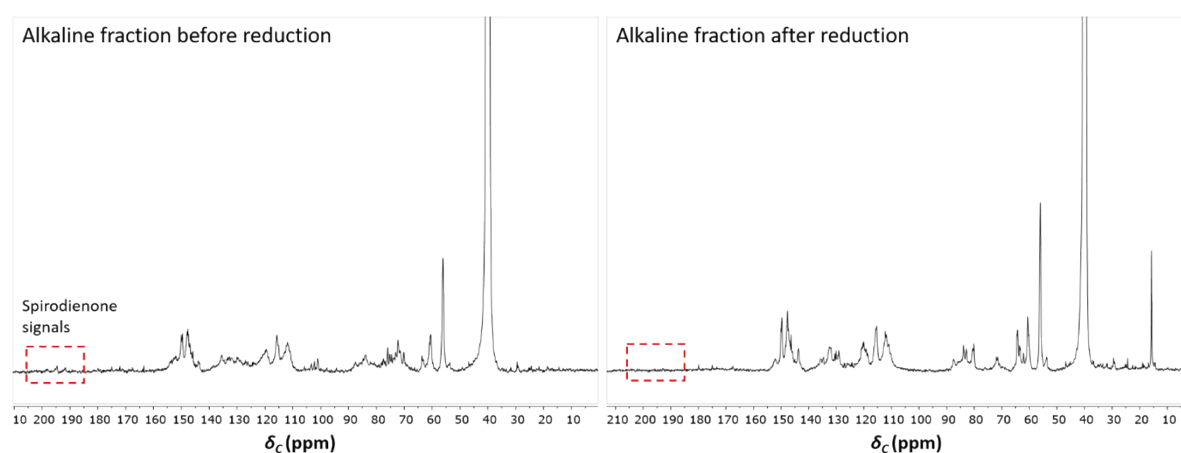

Figure S6d: <sup>13</sup>C-NMR spectra of alkaline fractions before and after reduction. The marked areas highlight the completion of the reduction as the spirodienone signals disappear. DMSO-*d*<sub>6</sub> was used for the NMR. Peak assignment can be found in Table S9.

In the following figures, S7a-b, the NMR spectra of dehydrogenation polymer lignin (DHP) produced in the presence of uronic acid or without the presence of uronic acid (reference sample) are presented. DHP was synthesized according to previous work.<sup>2</sup> Using a NE-1800 Eight Channel Programmable syringe pump, 20 mL coniferyl alcohol solution (34 mM in 50% acetone) and 20 mL of H<sub>2</sub>O<sub>2</sub> (34 mM) were pumped into 20 mL solution (50 mg/L in 50% acetone) of horseradish peroxidase (HRP) type IV. The addition occurred under a constant speed of 250 μL/h, at room temperature, under slow stirring (150 rpm). After the addition, the mixture was stirred for additionally 4h. For the DHP produced in the presence of galacturonic acid, 0.2M of the later were dissolved in 20 mL of 50% acetone and the pH was adjusted at 6.5-7 before the addition of HRP. The coniferyl alcohol used for these experiments was reduced from coniferyl aldehyde. This process is described elsewhere.<sup>3</sup>

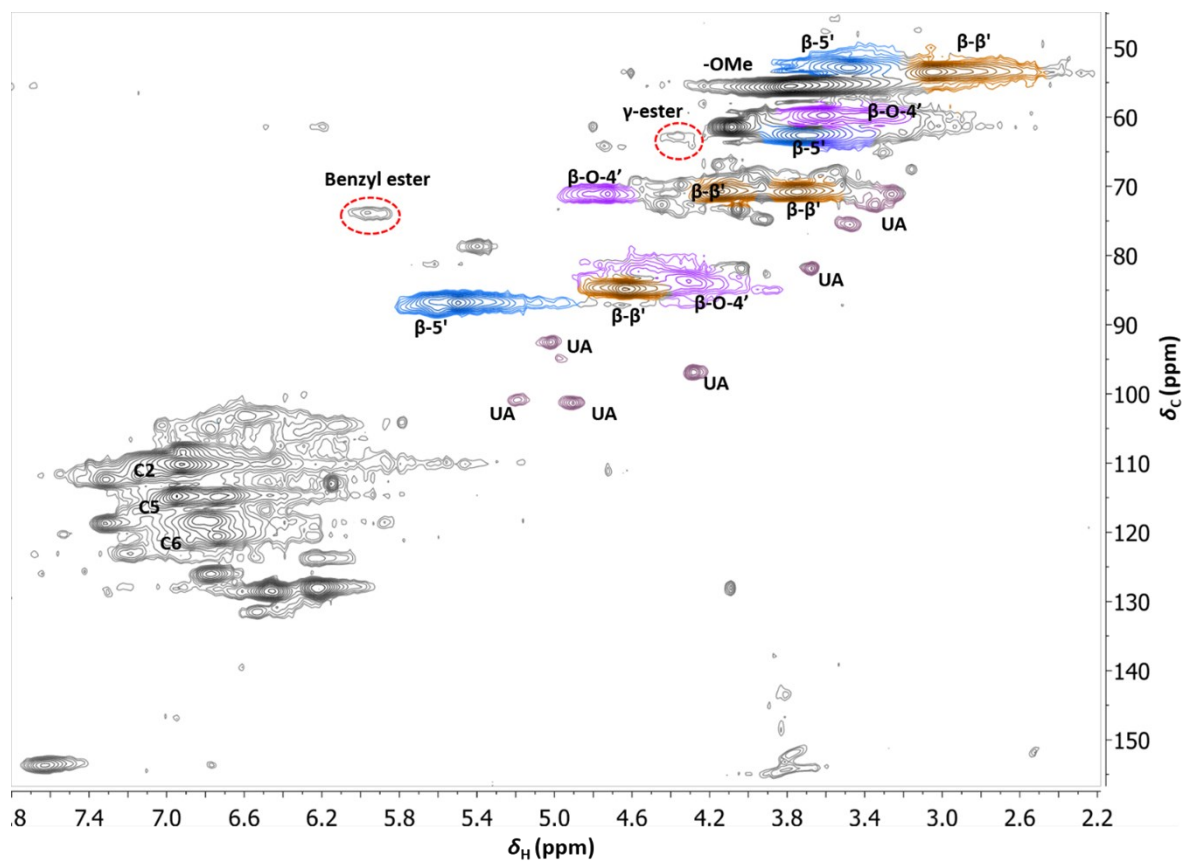

Figure S7a: HSQC of DHP produced in the presence of uronic acid. DMSO- $d_6$  was used for the NMR. Peak assignment can be found in Tables S7, S8.

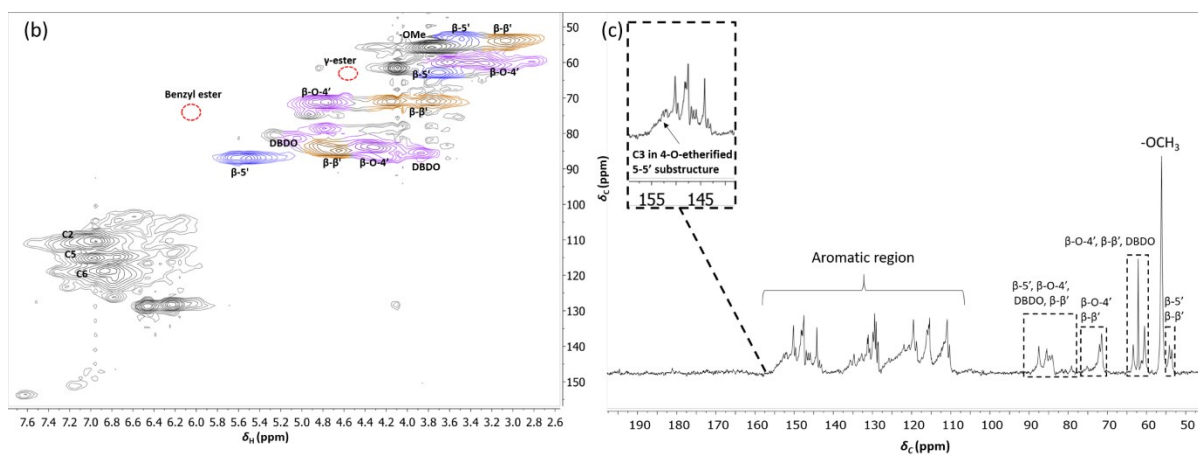

Figures S7b-c: HSQC of reference DHP. DMSO- $d_6$  was used for the NMR. Peak assignment can be found in Tables S7, S8.





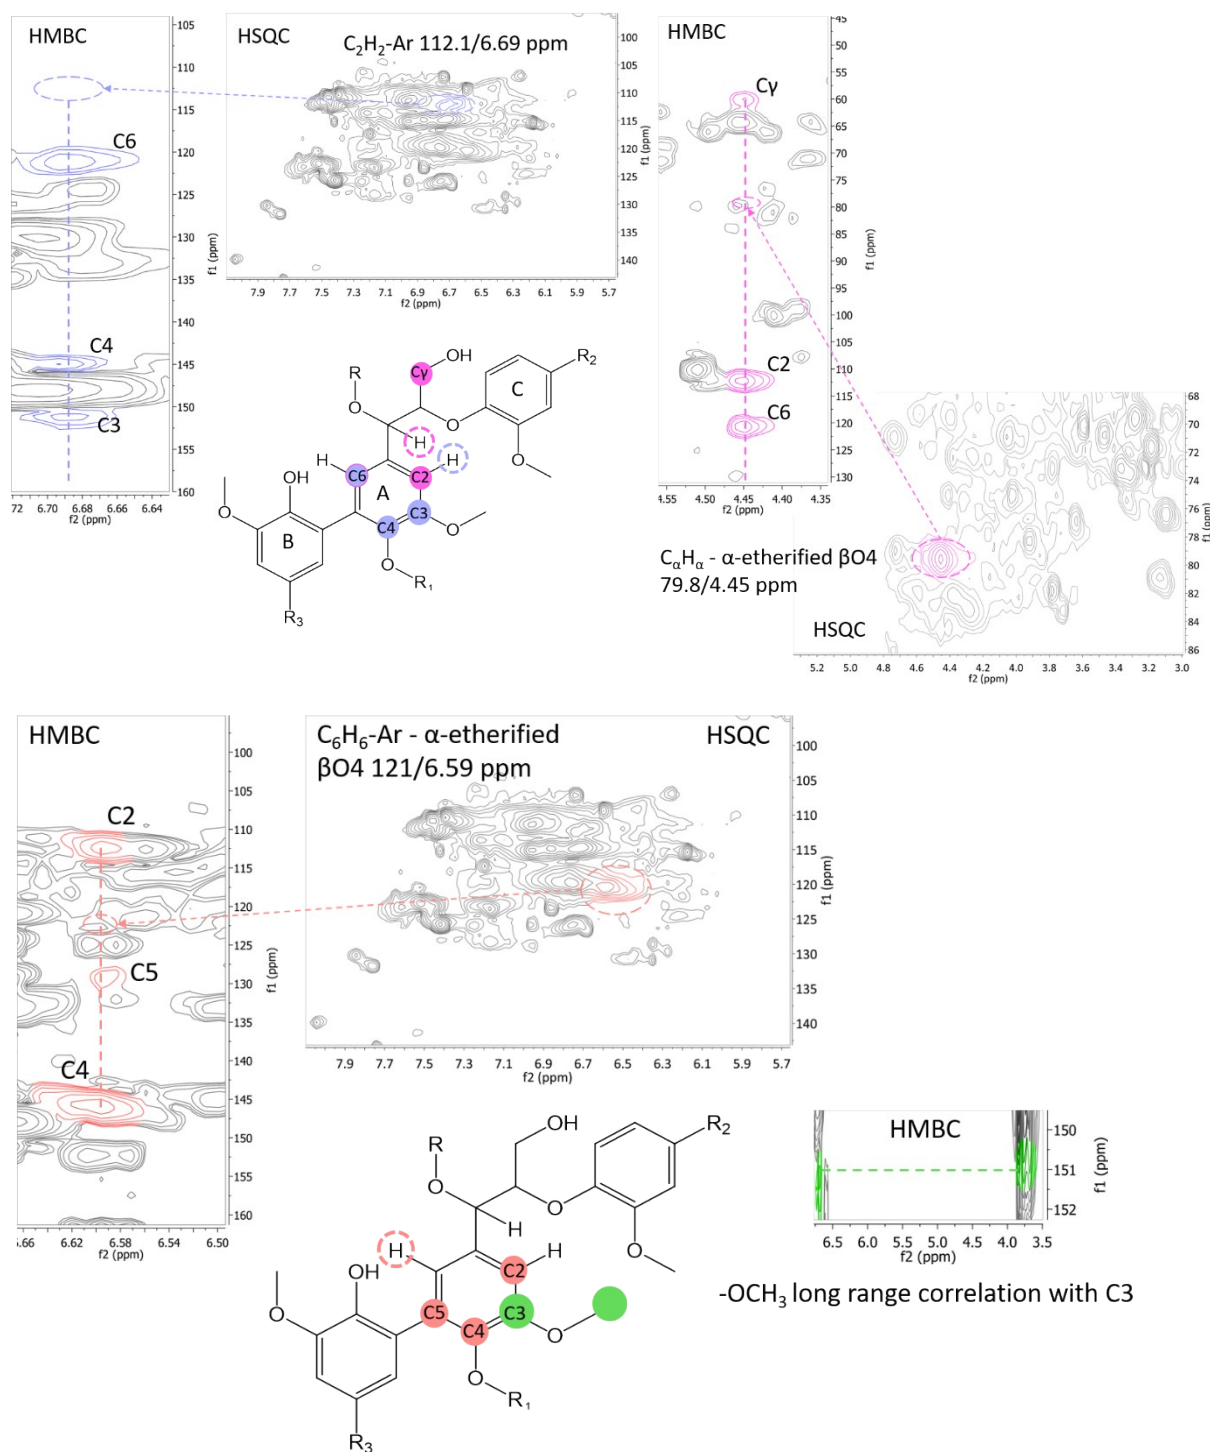

Figure S10: HMBC and HSQC spectra, evidence of 4-O-etherified 5-5' structures that are connected to  $\beta$ -O-4' substructures and are etherified at phenolic position, not in DBDO structures. Solvent for the NMR was  $DMSO-d_6$ .

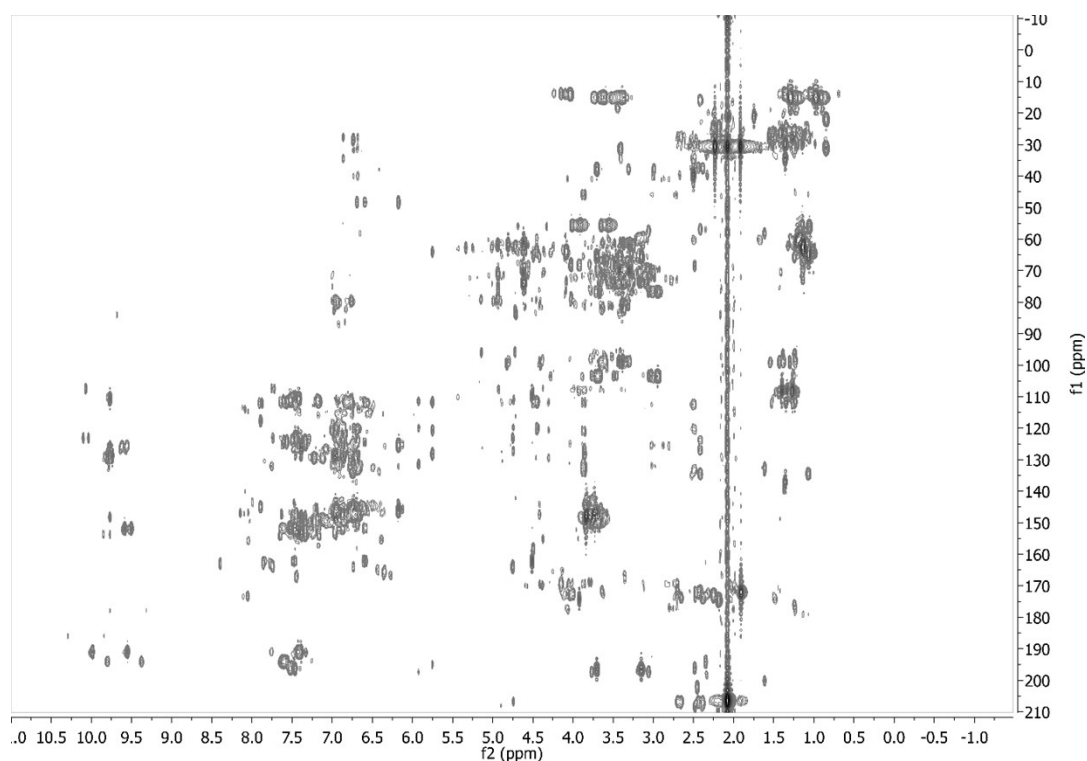

Figure S11: HMBC of lignin from warm water extract after mild acidolysis in ethanol and extraction with ethyl acetate. Solvent for the NMR was DMSO- $d_6$ .

Table S4: Comparison of lignin inter-unit linkages from HSQC and quantitative  $^{13}\text{C}$  NMR experiments.

|                                               | <b>%<math>\beta</math>-O-4'</b> |                      | <b><math>\beta</math>-5'</b> |                      |
|-----------------------------------------------|---------------------------------|----------------------|------------------------------|----------------------|
|                                               | HSQC-NMR*                       | $^{13}\text{C}$ -NMR | HSQC-NMR                     | $^{13}\text{C}$ -NMR |
| <b>ALK-EtOH, H<sup>+</sup>-red air milled</b> | 40                              | 42                   | 10                           | 11                   |
| <b>ALK-EtOH, H<sup>+</sup>-red N2 milled</b>  | 46                              | 47                   | 13                           | 12                   |
| <b>IL/EtOH, H<sup>+</sup>-red air milled</b>  | 41                              | 46                   | 13                           | 12                   |
| <b>IL/EtOH, H<sup>+</sup>-red N2 milled</b>   | 44                              | 47                   | 13                           | 13                   |

\*With HSQC-NMR, the total amount of  $\beta$ -O-4' is presented as described in the main paper.

Table S5: Quantification of 4-O-etherified 5-5' substructures with  $^{13}\text{C}$ -NMR.

|                                               | <b>% 5-5' etherified</b> |
|-----------------------------------------------|--------------------------|
| <b>ALK-EtOH, H<sup>+</sup>-red air milled</b> | 23                       |
| <b>ALK-EtOH, H<sup>+</sup>-red N2 milled</b>  | 23                       |
| <b>IL/EtOH, H<sup>+</sup>-red air milled</b>  | 26                       |
| <b>IL/EtOH, H<sup>+</sup>-red N2 milled</b>   | 24                       |
| <b>DHP*</b>                                   | 25                       |

\*DHP was not reduced before NMR analysis, hence the signal corresponding to 5-5' etherified bond overlaps with  $\alpha$ - and  $\gamma$ -carbonyls and spirodienone structures. Using the HSQC and  $^{13}\text{C}$  NMR data, the integral values for  $\alpha$ -carbonyls (3%), coniferyl aldehyde (2%), spirodienone (2%) and DBDO (3%) structures were subtracted from the integral value for C3 in 4-O-etherified 5-5' substructures.

Table S6: Most common lignin inter-unit linkages in all fractions. The amounts are calculated from the HSQC spectra, after normalization of C2-Ar integral to 100. Some of the samples were combined for the NMR analysis due to small amounts extracted and are presented in the same cell.

|                                  |            | %β-O-4' *                                          |    | %β-5' | %β-β' |
|----------------------------------|------------|----------------------------------------------------|----|-------|-------|
| Warm water extracts              | Air milled | 1h ball milled                                     | 15 | 5     | n.a   |
|                                  |            | 2h ball milled                                     | 18 | 4     | n.a   |
|                                  |            | 4h ball milled                                     | 12 | 3     | n.a   |
|                                  |            | 8h ball milled                                     | 16 | 3     | n.a   |
|                                  |            | 12h ball milled                                    | 18 | 4     | n.a   |
|                                  |            | 18h ball milled                                    | 23 | 4     | n.a   |
|                                  |            | 24h ball milled                                    | 16 | 4     | n.a   |
|                                  |            |                                                    |    |       |       |
|                                  | N2 milled  | 1h ball milled                                     | 17 | 4     | n.a   |
|                                  |            | 2h ball milled                                     | 18 | 5     | n.a   |
|                                  |            | 4h ball milled                                     | 26 | 4     | n.a   |
|                                  |            | 8h ball milled                                     | 24 | 4     | n.a   |
|                                  |            | 12h ball milled                                    | 20 | 5     | n.a   |
|                                  |            | 18h ball milled                                    | 23 | 4     | n.a   |
|                                  |            | 24h ball milled                                    | 22 | 5     | n.a   |
|                                  |            |                                                    |    |       |       |
| Alkaline extracts                | Air milled | 1h ball milled<br>2h ball milled<br>4h ball milled | 41 | 12    | 3     |
|                                  |            | 8h ball milled<br>12h ball milled                  | 46 | 12    | 3     |
|                                  |            | 18h ball milled                                    | 41 | 11    | 3     |
|                                  |            | 24h ball milled                                    | 35 | 11    | 3     |
|                                  |            |                                                    |    |       |       |
|                                  | N2 milled  | 1h ball milled<br>2h ball milled<br>4h ball milled | 40 | 12    | 2     |
|                                  |            | 8h ball milled                                     | 44 | 13    | 3     |
|                                  |            | 12h ball milled                                    | 42 | 13    | 3     |
|                                  |            | 18h ball milled                                    | 42 | 13    | 3     |
|                                  |            | 24h ball milled                                    | 44 | 12    | 3     |
|                                  |            |                                                    |    |       |       |
| IL/EtOH, H <sup>+</sup> extracts | Air milled | 1h ball milled<br>2h ball milled<br>4h ball milled | 45 | 12    | 3     |
|                                  |            | 8h ball milled<br>12h ball milled                  | 47 | 13    | 3     |
|                                  |            | 18h ball milled                                    | 48 | 12    | 3     |
|                                  |            | 24h ball milled                                    | 46 | 12    | 3     |
|                                  |            |                                                    |    |       |       |
|                                  | N2 milled  | 1h ball milled<br>2h ball milled                   | 42 | 12    | 2     |
|                                  |            | 4h ball milled                                     | 49 | 13    | 2     |
|                                  |            | 8h ball milled                                     | 47 | 12    | 3     |
|                                  |            | 12h ball milled                                    | 45 | 12    | 2     |
|                                  |            | 18h ball milled                                    | 49 | 15    | 2     |
|                                  |            | 24h ball milled                                    | 40 | 12    | 2     |
|                                  |            |                                                    |    |       |       |



\*For the alkaline and IL/EtOH, H<sup>+</sup> fractions, the total  $\beta$ -O-4' content is reported and calculated as described in the main paper.

Table S7:  $^{13}\text{C}$ - $^1\text{H}$  correlations of the main lignin inter-unit linkages and LCC identified in 2D HSQC spectra. DMSO- $d_6$  was used as solvent.

| $\delta_{\text{C}}$ (ppm) | $\delta_{\text{H}}$ (ppm) | Description                                                                        |
|---------------------------|---------------------------|------------------------------------------------------------------------------------|
| 71.4                      | 4.71                      | $\text{C}_\alpha/\text{H}_\alpha$ in $\gamma$ -hydroxylated $\beta$ -O-4'          |
| 83.7                      | 4.28                      | $\text{C}_\beta/\text{H}_\beta$ in $\gamma$ -hydroxylated $\beta$ -O-4' in G-units |
| 59.9                      | 3.42/3.85                 | $\text{C}_\gamma/\text{H}_\gamma$ in $\beta$ -O-4'                                 |
| 85.7                      | 4.3                       | $\text{C}_\beta/\text{H}_\beta$ in $\gamma$ -hydroxylated $\beta$ -O-4' in S-units |
| 81.0                      | 4.62                      | $\text{C}_\gamma/\text{H}_\gamma$ in $\gamma$ -acylated $\beta$ -O-4'              |
| 85.6                      | 4.33                      | $\text{C}_\beta/\text{H}_\beta$ in $\beta$ -O-4' in Benzyl Ether structure         |
| 61.2                      | 3.79                      | $\text{C}_\gamma/\text{H}_\gamma$ in $\beta$ -O-4' in Benzyl Ether structure       |
| 79.6                      | 4.48                      | $\text{C}_\alpha/\text{H}_\alpha$ in $\alpha$ -O-ethylated $\beta$ -O-4'           |
| 82.9                      | 4.86                      | $\text{C}_\alpha/\text{H}_\alpha$ in Dibenzodioxin                                 |
| 85.5                      | 3.88                      | $\text{C}_\beta/\text{H}_\beta$ in Dibenzodioxin                                   |
| 60.4                      | 3.42                      | $\text{C}_\gamma/\text{H}_\gamma$ in Dibenzodioxin                                 |
| 79.4                      | 4.11                      | $\text{C}_\beta/\text{H}_\beta$ in Spirodienone                                    |
| 86.8                      | 5.47                      | $\text{C}_\alpha/\text{H}_\alpha$ in Phenylcoumaran                                |
| 52.9                      | 3.47                      | $\text{C}_\beta/\text{H}_\beta$ in Phenylcoumaran                                  |
| 62.5                      | 3.70                      | $\text{C}_\gamma/\text{H}_\gamma$ in Phenylcoumaran                                |
| 84.5                      | 4.65                      | $\text{C}_\alpha/\text{H}_\alpha$ in Resinol                                       |
| 53.5                      | 3.10                      | $\text{C}_\beta/\text{H}_\beta$ in Resinol                                         |
| 71.0                      | 3.78/4.15                 | $\text{C}_\gamma/\text{H}_\gamma$ in Resinol                                       |
| 110.5                     | 7.35                      | $\text{C}_2/\text{H}_2$ in $(\text{C}=\text{O})_\alpha$ in G-units                 |
| 122.6                     | 7.5-7.7                   | $\text{C}_6/\text{H}_6$ in $(\text{C}=\text{O})_\alpha$ in G-units                 |
| 105.5                     | 7.0-7.2                   | $\text{C}_{2,6}/\text{H}_{2,6}$ in $(\text{C}=\text{O})_\alpha$ in G-units         |
| 153.4                     | 7.61                      | $\text{C}_\alpha/\text{H}_\alpha$ in Cinnamyl aldehyde                             |
| 126.1                     | 6.76                      | $\text{C}_\beta/\text{H}_\beta$ in Cinnamyl aldehyde                               |
| 59.5                      | 4.04                      | $\text{C}_\gamma/\text{H}_\gamma$ in Cinnamyl alcohol                              |
| 55.3                      | 3.71                      | C/H in methoxy group in G-, S-units                                                |
| 104.4                     | 6.72                      | $\text{C}_2/\text{H}_2$ and $\text{C}_6/\text{H}_6$ in S-units                     |
| 110.8                     | 6.96                      | $\text{C}_2/\text{H}_2$ in G-units                                                 |
| 114.7                     | 6.73                      | $\text{C}_5/\text{H}_5$ in G-units                                                 |
| 119.6                     | 6.76                      | $\text{C}_6/\text{H}_6$ in G-units                                                 |
| 112.1                     | 6.69                      | $\text{C}_2/\text{H}_2$ in 4-O-etherified 5-5' substructures                       |
| 120.6                     | 6.59                      | $\text{C}_6/\text{H}_6$ in 4-O-etherified 5-5' substructures                       |
| 127.9                     | 7.19                      | $\text{C}_2/\text{H}_2$ and $\text{C}_6/\text{H}_6$ in H-units                     |
| 101.9                     | 4.92                      | Phenyl Glycoside in G-units                                                        |
| 74.5                      | 5.92                      | $\text{C}_\alpha/\text{H}_\alpha$ in Benzyl ester                                  |
| 63.3                      | 4.41                      | $\text{C}_\gamma/\text{H}_\gamma$ in $\gamma$ -esterified LCC                      |
| 62.6                      | 4.23/3.82                 | $\gamma$ -acetyl esters in lignin                                                  |

Table S8: Main  $^{13}\text{C}$ - $^1\text{H}$  correlations of carbohydrate bonds identified in 2D HSQC. The solvent used was  $\text{DMSO-}d_6$ .

|  | $\delta_{\text{C}}$ (ppm) | $\delta_{\text{H}}$ (ppm) | Description                                                   |
|--|---------------------------|---------------------------|---------------------------------------------------------------|
|  | 107.8                     | 4.75                      | C1/H1 in $\beta$ -L-arabinopyranoside                         |
|  | 83.3                      | 3.76                      | C2/H2 in $\beta$ -L-arabinopyranoside                         |
|  | 84.6                      | 3.98                      | C4/H4 in $\beta$ -L-arabinopyranoside                         |
|  | 62.3                      | 3.36/3.44                 | C5/H5 in $\beta$ -L-arabinopyranoside                         |
|  | 101.6                     | 4.36                      | C1/H1 in $\beta$ -D-glucopyranoside                           |
|  | 74.8                      | 2.88                      | C2/H2 in $\beta$ -D-glucopyranoside                           |
|  | 76.7                      | 3.06                      | C3/H3 in $\beta$ -D-glucopyranoside                           |
|  | 80.1                      | 3.34                      | C4/H4 in $\beta$ -D-glucopyranoside                           |
|  | 70.3                      | 3.18                      | C5/H5 in $\beta$ -D-glucopyranoside                           |
|  | 60.0                      | 3.56                      | C6/H6 in $\beta$ -D-glucopyranoside                           |
|  | 101.5                     | 4.36                      | C1/H1 in $\beta$ -D-xylopyranoside                            |
|  | 72.6                      | 3.02                      | C2/H2 in $\beta$ -D-xylopyranoside                            |
|  | 74.9                      | 3.30                      | C3/H3 in $\beta$ -D-xylopyranoside                            |
|  | 75.3                      | 3.45                      | C4/H4 in $\beta$ -D-xylopyranoside                            |
|  | 62.9                      | 3.13/3.78                 | C5/H5 in $\beta$ -D-xylopyranoside                            |
|  | 75.0                      | 4.78                      | C3/H3 in 3-O-acetyl- $\beta$ -D-xylopyranoside                |
|  | 71.4                      | 4.49                      | C2/H2 in 2,3-O-acetyl- $\beta$ -D-xylopyranoside              |
|  | 72.9                      | 4.97                      | C3/H3 in 2,3-O-acetyl- $\beta$ -D-xylopyranoside              |
|  | 99.2                      | 4.67                      | C1/H1 in 2,3-O-acetyl- $\beta$ -D-xylopyranoside              |
|  | 73.7                      | 4.45                      | C2/H2 in 2-O-acetyl- $\beta$ -D-xylopyranoside                |
|  | 100.0                     | 4.44                      | C1/H1 in 2-O-acetyl- $\beta$ -D-xylopyranoside                |
|  | 66.8                      | 3.28                      | C4/H4 in $\beta$ -D-xylopyranoside of xylans non reducing end |
|  | 65.3                      | 2.98/3.61                 | C5/H5 in $\beta$ -D-xylopyranoside of xylans non reducing end |
|  | 103.4                     | 4.14                      | C1/H1 in $\beta$ -D-xylopyranoside of xylans non reducing end |
|  | 92.3                      | 4.84                      | C1/H1 in $\alpha$ -D-xylopyranoside of xylans reducing end    |
|  | 97.3                      | 4.20                      | C1/H1 in $\beta$ -D-xylopyranoside of xylans reducing end     |
|  | 69.7                      | 3.24                      | C2/H2 in $\alpha$ -D-xylopyranoside of xylans reducing end    |
|  | 100.3                     | 4.51                      | C1/H1 in $\beta$ -D-mannopyranoside                           |
|  | 74.5                      | 2.87                      | C2/H2 in $\beta$ -D-mannopyranoside                           |
|  | 76.5                      | 3.06                      | C3/H3 in $\beta$ -D-mannopyranoside                           |
|  | 79.1                      | 3.36                      | C4/H4 in $\beta$ -D-mannopyranoside                           |
|  | 76.9                      | 3.60                      | C5/H5 in $\beta$ -D-mannopyranoside                           |
|  | 70.8                      | 5.21                      | C2/H2 in 2-O-acetyl $\beta$ -D-mannopyranoside                |
|  | 73.1                      | 4.80                      | C3/H3 in 3-O-acetyl $\beta$ -D-mannopyranoside                |
|  | 63.7                      | 4.03/4.26                 | C6/H6 in 6-O-acetyl $\beta$ -D-mannopyranoside                |
|  | 93.5                      | 4.87                      | C1/H1 in $\alpha$ -D-mannopyranoside of mannans reducing end  |
|  | 93.8                      | 4.55                      | C1/H1 in $\beta$ -D-mannopyranoside of mannans reducing end   |
|  | 105.3                     | 4.23                      | C1/H1 in $\alpha$ -D-galactopyranoside                        |
|  | 96.8                      | 5.11                      | C1/H1 in 4-O-methyl- $\alpha$ -D-Glucuronic Acid              |
|  | 81.4                      | 3.07                      | C4/H4 in 4-O-methyl- $\alpha$ -D- Glucuronic Acid             |
|  | 91.9/95.5                 | 5.18/4.98                 | C1/H1 in Galacturonic acid                                    |

Table S9: Peak assignments for the most common lignin inter-unit linkages  $^{13}\text{C}$  NMR spectra. Due to signal overlap, not all bonds reported in Table S8 can be reported. The solvent used was  $\text{DMSO}-d_6$ .

| $\delta_{\text{C}}$ (ppm) | Description                                                           |
|---------------------------|-----------------------------------------------------------------------|
| 55.5                      | Methoxy group in G- units                                             |
| 71.4                      | $\text{C}_{\alpha}$ in $\gamma$ -hydroxylated $\beta$ -O-4'           |
| 83.4                      | $\text{C}_{\beta}$ in $\gamma$ -hydroxylated $\beta$ -O-4' in G-units |
| 60.0                      | $\text{C}_{\gamma}$ in $\beta$ -O-4'                                  |
| 80.9                      | $\text{C}_{\gamma}$ in $\gamma$ -acylated $\beta$ -O-4'               |
| 85.5                      | $\text{C}_{\beta}$ in $\beta$ -O-4' in Benzyl ether structure         |
| 79.7                      | $\text{C}_{\alpha}$ in $\alpha$ -O-ethylated $\beta$ -O-4'            |
| 82.5                      | $\text{C}_{\alpha}$ in Dibenzodioxin                                  |
| 85.5                      | $\text{C}_{\beta}$ in Dibenzodioxin                                   |
| 79.7                      | $\text{C}_{\beta}$ in Spirodienone                                    |
| 87.0                      | $\text{C}_{\alpha}$ in Phenylcoumaran                                 |
| 53.1                      | $\text{C}_{\beta}$ in Phenylcoumaran                                  |
| 62.7                      | $\text{C}_{\gamma}$ in Phenylcoumaran                                 |
| 84.6                      | $\text{C}_{\alpha}$ in Resinol                                        |
| 53.7                      | $\text{C}_{\beta}$ in Resinol                                         |
| 71.0                      | $\text{C}_{\gamma}$ in Resinol                                        |
| 59.5                      | $\text{C}_{\gamma}$ in Cinnamyl alcohol                               |
| 110.7                     | $\text{C}_2$ in G-units                                               |
| 114.7                     | $\text{C}_5$ in G-units                                               |
| 111.9                     | $\text{C}_2$ in 4-O-etherified 5-5' substructures                     |
| 120.6                     | $\text{C}_6$ in 4-O-etherified 5-5' substructures                     |
| 74.5                      | $\text{C}_{\alpha}$ in Benzyl ester                                   |

## References

1. SCAN, Carbohydrate composition, 2009, SCAN-CM, 71, 09
2. N. Giummarella, C. Gioia, M. Lawoko. *Green Chemistry*. 2018, **20**, 2651-62.
3. M. Jawerth, M. Lawoko, S. Lundmark, C. Perez Berumen, M. Johansson, *RSC Advances*, 2016, **6**, 96281-8.
